# Supplementary material for: Novel inorganic aromatic mixed-valent superalkali electride CaN3Ca: an alkaline-earth-based high-sensitivity multi-state nonlinear optical molecular switch
Source: Royal Society of Chemistry journal article supplement (doi:10.1039/c9cp06848a), 2020-01-01
Supplement: c9cp06848a1.pdf [file c9cp06848a1.pdf]

# **Novel Inorganic Aromatic Mixed-Valent Superalkali Electrides $\text{CaN}_3\text{Ca}$ : Alkaline-Earth-Based High-Sensitive Multi-State Nonlinear Optical Molecular Switch**

Yin-Feng Wang,<sup>\*a</sup> Jia-Min Tang,<sup>a</sup> Yun-Meng Liu,<sup>a</sup> Miao Xie,<sup>a</sup> Jia Li,<sup>a</sup> Jianguo Huang,<sup>a\*</sup> Fan Zhong,<sup>a</sup> Wen Zhang<sup>a</sup> and Zhi-Ru Li<sup>\*b</sup>

<sup>a</sup>Jiangxi Province Key Laboratory of Coordination Chemistry, Institute of Applied Chemistry, School of Chemistry and Chemical Engineering, Jingtangshan University, Ji'an, Jiangxi 343009 (P.R. China).

Email: [cyclont@yeah.net](mailto:cyclont@yeah.net); [hjg0468@163.com](mailto:hjg0468@163.com)

<sup>b</sup>Laboratory of Theoretical Computational Chemistry, Institute of Theoretical Chemistry, Jilin University, Changchun 130023 (P.R. China)

Email: [lzr@jlu.edu.cn](mailto:lzr@jlu.edu.cn)

## Contents

|                                                                                                                                                                                                                                                                                                                                                                             |     |
|-----------------------------------------------------------------------------------------------------------------------------------------------------------------------------------------------------------------------------------------------------------------------------------------------------------------------------------------------------------------------------|-----|
| Optimized Cartesian coordinates for $MN_3M$ ( $M = \text{Be}, \text{Mg}, \text{and Ca}$ ) at the MP2/6-311+G(3df) level.....                                                                                                                                                                                                                                                | S3  |
| <b>Table S1.</b> Static first hyperpolarizability ( $\beta_0$ ) of <b>1</b> and <b>3</b> of $\text{CaN}_3\text{Ca}$ at the MP2/6-311+G(3df) level in different applied electric fields.....                                                                                                                                                                                 | S4  |
| <b>Table S2.</b> Optimized structural parameters (in Å), point group (PG), characteristic vibrational frequencies ( $\omega_c$ , in $\text{cm}^{-1}$ ), vertical ionization energy (VIE, in eV), energies of HOMOs ( $\epsilon_{\text{HOMO}}$ , in eV), and HOMO-LUMO gaps ( $\epsilon_{\text{gap}}$ , in eV) of $MN_3M$ ( $M = \text{Be}, \text{Mg}, \text{and Ca}$ )..... | S5  |
| <b>Table S3.</b> Distances of Ca-centroid of the $\text{N}_3^{3-}$ ring ( $L_1$ and $L_2$ ) of <b>1</b> under the effect of external electric fields ( <i>EEFs</i> ). .....                                                                                                                                                                                                 | S6  |
| <b>Fig. S1.</b> Isomers of $\text{CaN}_3\text{Ca}$ at the B3LYP/6-311+G(3df) level. Relative energy in parentheses. $T_1 \sim T_3$ are transition states due to an imaginary frequency of each of them.....                                                                                                                                                                 | S7  |
| <b>Fig. S2.</b> Relative energies and interaction energies for linear and cyclic $\text{Ca}_2\text{N}_3$ compounds at the CCSD(T) /6-311+G(3df)//B3LYP/6-311+G(3df) level.....                                                                                                                                                                                              | S8  |
| <b>Fig. S3.</b> Different configurations ( <b>1</b> , <b>2</b> , and <b>3</b> ) of $\text{BeN}_3\text{Be}$ . Molecular orbitals at the isovalue of 0.02 au.....                                                                                                                                                                                                             | S9  |
| <b>Fig. S4.</b> Relationship between NICS values and distance from the center of the $\text{N}_3$ subunit in <b>1</b> , <b>2</b> , and <b>3</b> . .....                                                                                                                                                                                                                     | S10 |

|                                                |             |             |             |
|------------------------------------------------|-------------|-------------|-------------|
| CaN <sub>3</sub> Ca ( <i>D</i> <sub>3h</sub> ) |             |             |             |
| N                                              | 0.00000000  | 0.87985560  | 0.00000000  |
| N                                              | 0.76197714  | -0.43992780 | 0.00000000  |
| N                                              | -0.76197714 | -0.43992780 | 0.00000000  |
| Ca                                             | 0.00000000  | 0.00000000  | 2.03126698  |
| Ca                                             | 0.00000000  | 0.00000000  | -2.03126698 |

|                                                |             |             |             |
|------------------------------------------------|-------------|-------------|-------------|
| CaN <sub>3</sub> Ca ( <i>C</i> <sub>3v</sub> ) |             |             |             |
| N                                              | -0.00000000 | 0.87712973  | -0.04890368 |
| N                                              | -0.75961662 | -0.43856486 | -0.04890368 |
| N                                              | 0.75961662  | -0.43856486 | -0.04890368 |
| Ca                                             | 0.00000000  | 0.00000000  | -2.01621761 |
| Ca                                             | 0.00000000  | 0.00000000  | 2.06756647  |

|                                                |             |             |             |
|------------------------------------------------|-------------|-------------|-------------|
| MgN <sub>3</sub> Mg ( <i>D</i> <sub>3h</sub> ) |             |             |             |
| N                                              | 0.00000000  | 0.91721200  | 0.00000000  |
| N                                              | 0.79432900  | -0.45860600 | 0.00000000  |
| N                                              | -0.79432900 | -0.45860600 | 0.00000000  |
| Mg                                             | 0.00000000  | 0.00000000  | 1.79780000  |
| Mg                                             | 0.00000000  | 0.00000000  | -1.79780000 |

|                                                |             |             |             |
|------------------------------------------------|-------------|-------------|-------------|
| MgN <sub>3</sub> Mg ( <i>C</i> <sub>3v</sub> ) |             |             |             |
| N                                              | -0.78572904 | 0.45364087  | -0.03662530 |
| N                                              | 0.00000000  | -0.90728175 | -0.03662530 |
| N                                              | 0.78572904  | 0.45364087  | -0.03662530 |
| Mg                                             | -0.00000000 | -0.00000000 | -1.78057440 |
| Mg                                             | -0.00000000 | -0.00000000 | 1.84559043  |

|                                                |             |             |             |
|------------------------------------------------|-------------|-------------|-------------|
| BeN <sub>3</sub> Be ( <i>D</i> <sub>3h</sub> ) |             |             |             |
| N                                              | 0.00000000  | 0.92246100  | 0.00000000  |
| N                                              | 0.79887500  | -0.46123100 | 0.00000000  |
| N                                              | -0.79887500 | -0.46123100 | 0.00000000  |
| Be                                             | 0.00000000  | 0.00000000  | 1.35473200  |
| Be                                             | 0.00000000  | 0.00000000  | -1.35473200 |

|                                                |             |             |             |
|------------------------------------------------|-------------|-------------|-------------|
| BeN <sub>3</sub> Be ( <i>C</i> <sub>3v</sub> ) |             |             |             |
| N                                              | 0.00000000  | 0.90977608  | -0.02257123 |
| N                                              | -0.78788920 | -0.45488804 | -0.02257123 |
| N                                              | 0.78788919  | -0.45488804 | -0.02257123 |
| Be                                             | 0.00000000  | 0.00000000  | -1.30935477 |
| Be                                             | 0.00000000  | 0.00000000  | 1.42785372  |

**Table S1.** Static first hyperpolarizability ( $\beta_0$ , au) of **1** and **3** of  $\text{CaN}_3\text{Ca}$  at the MP2/6-311+G(3df) level in different applied electric fields ( $EEF$ , au).

| <i>EEF</i> | <b>1</b> | <b>3</b> |
|------------|----------|----------|
| 0.0001     | 23503    | 23503    |
| 0.0005     | 24308    | 24308    |
| 0.0007     | 25362    | 25362    |
| 0.0010     | 27876    | 27876    |
| 0.0012     | 30390    | 30390    |
| 0.0015     | 36113    | 36113    |
| 0.0020     | 56880    | 56880    |

**Table S2.** Optimized structural parameters (in Å), point group (PG), characteristic vibrational frequencies ( $\omega_c$ , in  $\text{cm}^{-1}$ ), vertical ionization energy (VIE, in eV), energies of HOMOs ( $\epsilon_{\text{HOMO}}$ , in eV), and HOMO-LUMO gaps ( $\epsilon_{\text{gap}}$ , in eV) of  $\text{MN}_3\text{M}$  (M = Be, Mg, and Ca).

|          | Structural Parameters |       |       |       |         |         | $\omega_c$ | VIE  | $\epsilon_{\text{HOMO}}$ | $\epsilon_{\text{gap}}$ |
|----------|-----------------------|-------|-------|-------|---------|---------|------------|------|--------------------------|-------------------------|
|          | PG                    | M1-N  | M2-N  | N-N   | $L_1^a$ | $L_2^b$ |            |      |                          |                         |
| M = Ca   |                       |       |       |       |         |         |            |      |                          |                         |
| <b>1</b> | $C_{3v}$              | 2.291 | 2.154 | 1.519 | 2.068   | 2.016   | 611        | 3.90 | -3.89                    | 1.78                    |
| <b>2</b> | $D_{3h}$              | 2.214 | 2.214 | 1.524 | 2.031   | 2.031   | 883        | 3.62 | -3.23                    | 3.01                    |
| <b>3</b> | $C_{3v}$              | 2.154 | 2.291 | 1.519 | 2.016   | 2.068   | 611        | 3.90 | -3.89                    | 1.78                    |
| M = Mg   |                       |       |       |       |         |         |            |      |                          |                         |
| <b>1</b> | $C_{3v}$              | 2.089 | 1.965 | 1.571 | 1.882   | 1.743   | 699        | 5.59 | -5.70                    | 4.05                    |
| <b>2</b> | $D_{3h}$              | 2.018 | 2.018 | 1.589 | 1.798   | 1.798   | 923        | 5.46 | -5.03                    | 2.81                    |
| <b>3</b> | $C_{3v}$              | 1.965 | 2.089 | 1.571 | 1.743   | 1.882   | 699        | 5.59 | -5.70                    | 4.05                    |
| M = Be   |                       |       |       |       |         |         |            |      |                          |                         |
| <b>1</b> | $C_{3v}$              | 1.712 | 1.576 | 1.576 | 1.450   | 1.287   | 923        | 6.53 | -12.13                   | -11.02                  |
| <b>2</b> | $D_{3h}$              | 1.639 | 1.639 | 1.598 | 1.305   | 1.305   | 1590       | 6.23 | -12.34                   | -12.00                  |
| <b>3</b> | $C_{3v}$              | 1.576 | 1.712 | 1.576 | 1.287   | 1.450   | 923        | 6.53 | -12.13                   | -11.02                  |

<sup>a</sup> Distance of M1-centroid of the  $\text{N}_3^{3-}$  ring, <sup>b</sup> Distance of M2-centroid of the  $\text{N}_3^{3-}$  ring.

**Table S3** Distances of Ca-centroid of the  $N_3^{3-}$  ring ( $L_1$  and  $L_2$ , in Å) of **1** under the effect of external electric fields (*EEFs*).

| <i>EEF</i> / ( $10^4$ au) | $L_1$ | $L_2$ | <i>EEF</i> / ( $10^4$ au) | $L_1$ | $L_2$ |
|---------------------------|-------|-------|---------------------------|-------|-------|
| 0                         | 2.116 | 1.967 | 65                        | 2.075 | 1.998 |
| 1                         | 2.116 | 1.967 | 70                        | 2.071 | 2.001 |
| 2                         | 2.116 | 1.967 | 75                        | 2.065 | 2.005 |
| 3                         | 2.116 | 1.967 | 80                        | 2.057 | 2.009 |
| 4                         | 2.115 | 1.969 | 85                        | 2.045 | 2.014 |
| 5                         | 2.114 | 1.969 | 90                        | 2.017 | 2.027 |
| 6                         | 2.114 | 1.970 | 95                        | 2.002 | 2.035 |
| 7                         | 2.114 | 1.970 | 100                       | 1.995 | 2.040 |
| 8                         | 2.113 | 1.970 | 105                       | 1.990 | 2.044 |
| 9                         | 2.113 | 1.971 | 110                       | 1.987 | 2.047 |
| 10                        | 2.112 | 1.971 | 115                       | 1.985 | 2.050 |
| 11                        | 2.110 | 1.972 | 120                       | 1.983 | 2.054 |
| 12                        | 2.110 | 1.972 | 125                       | 1.981 | 2.056 |
| 13                        | 2.109 | 1.973 | 130                       | 1.980 | 2.059 |
| 14                        | 2.109 | 1.973 | 135                       | 1.978 | 2.062 |
| 15                        | 2.108 | 1.974 | 140                       | 1.977 | 2.065 |
| 16                        | 2.108 | 1.974 | 145                       | 1.975 | 2.068 |
| 17                        | 2.107 | 1.975 | 150                       | 1.974 | 2.071 |
| 18                        | 2.106 | 1.975 | 155                       | 1.973 | 2.074 |
| 19                        | 2.106 | 1.975 | 160                       | 1.971 | 2.077 |
| 20                        | 2.105 | 1.976 | 165                       | 1.970 | 2.080 |
| 25                        | 2.102 | 1.978 | 170                       | 1.969 | 2.083 |
| 30                        | 2.099 | 1.980 | 175                       | 1.968 | 2.086 |
| 35                        | 2.096 | 1.983 | 180                       | 1.966 | 2.089 |
| 40                        | 2.093 | 1.985 | 185                       | 1.965 | 2.092 |
| 45                        | 2.090 | 1.988 | 190                       | 1.964 | 2.095 |
| 50                        | 2.087 | 1.990 | 195                       | 1.963 | 2.099 |
| 60                        | 2.083 | 1.993 | 200                       | 1.962 | 2.102 |

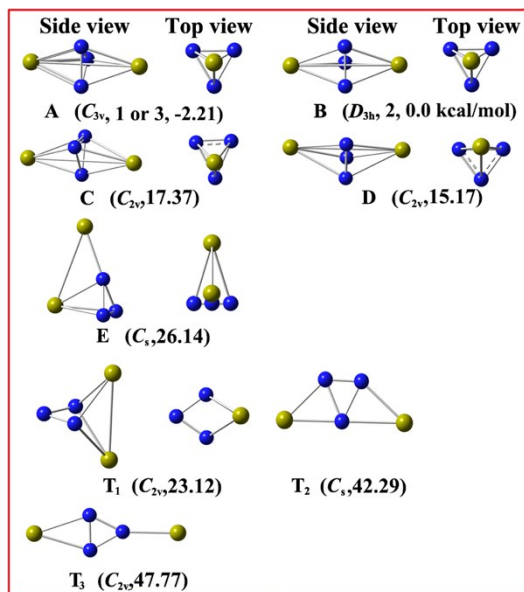

**Fig. S1.** Isomers of CaN<sub>3</sub>Ca at the B3LYP/6-311+G(3df) level. Relative energy in parentheses. T<sub>1</sub> ~ T<sub>3</sub> are transition states due to an imaginary frequency of each of them.

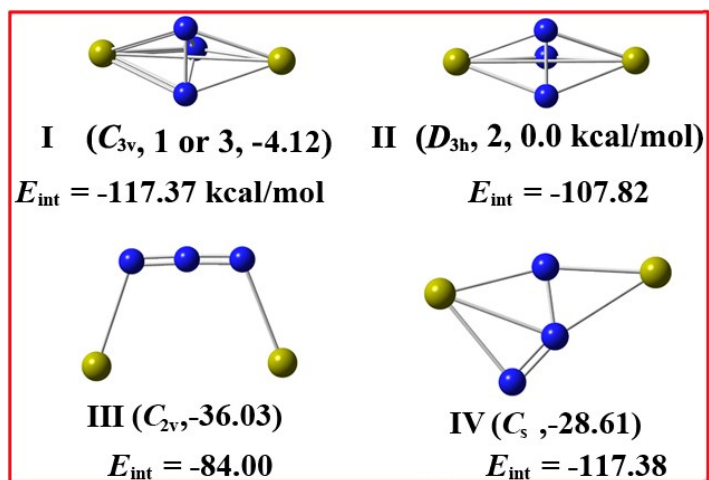

**Fig. S2.** Relative energies and interaction energies for linear and cyclic Ca<sub>2</sub>N<sub>3</sub> compounds at the CCSD(T) /6-311+G(3df)//B3LYP/6-311+G(3df) level.



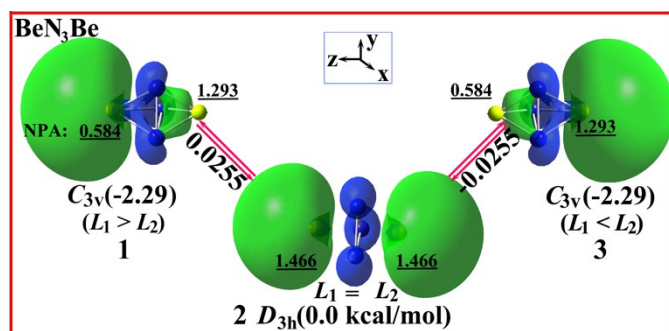

**Fig. S3.** Different configurations (1, 2, and 3) of BeN<sub>3</sub>Be. . Underlined values are NPA charges. Molecular orbitals at the isovalue of 0.02 au.

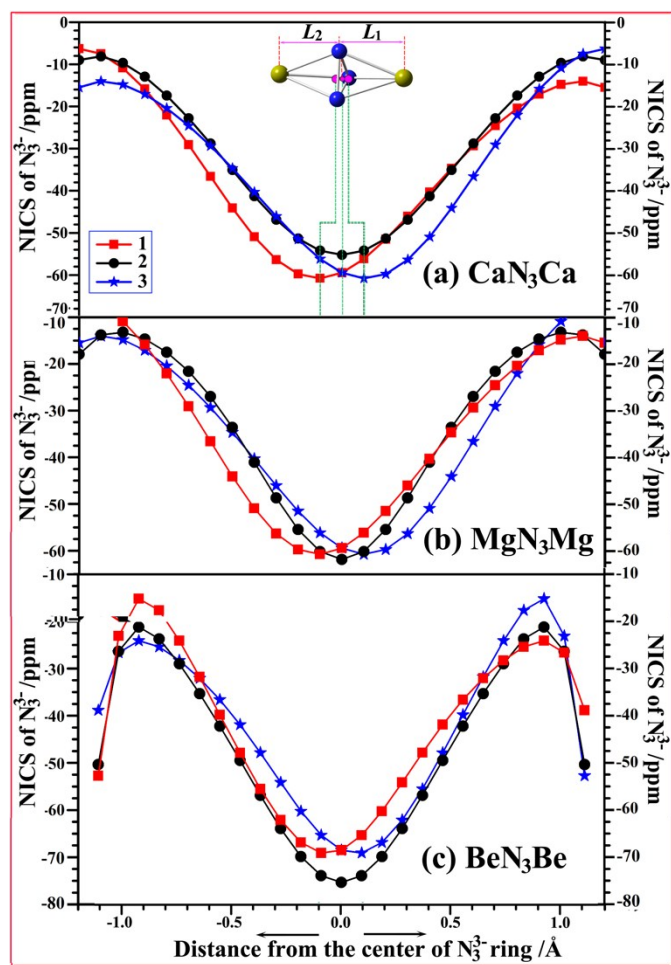

**Fig. S4.** Relationship between NICS values and distance from the center of the  $N_3$  subunit in **1**, **2**, and **3**.
